# Supplementary material
Source: Royal Society of Chemistry journal article supplement (doi:10.1039/d6tb00290k)
Supplement: d6tb00290k1.pdf [file d6tb00290k1.pdf]

## **Fe-MOFs-based fluorescent and colorimetric dual-readout nanoprobe for sensitive detection of $\alpha$ -lipomycin**

Xianfeng Wang<sup>1,a</sup>, Genchang Chen<sup>1,a</sup>, Gongle Shen<sup>1,a</sup>, Xuefei Chen<sup>2</sup>, Lei Shen<sup>3</sup>, Bingqing Zhao<sup>2</sup>, Jianhua Su<sup>4,\*</sup>, Dapeng Zhou<sup>5,6,\*</sup>, Sen Yang<sup>3,\*</sup>

<sup>1</sup> Wuxi School of Medicine, Jiangnan University, Wuxi, 214122, PR China

<sup>2</sup> Department of Clinical Laboratory, Yangpu Hospital, School of Medicine, Tongji University, Shanghai, 200090, China

<sup>3</sup> Daqiao Community Healthcare Centre, Yangpu District, Shanghai, 200090, China

<sup>4</sup> Gerontology, Wuxi No.2 People's Hospital (Jiangnan University Medical Center), PR China

<sup>5</sup> Life Science and Clinical Medicine Research Center, Affiliated Hospital of Youjiang Medical University for Nationalities, Baise, China

<sup>6</sup> Department of Burn Plastic and Wound Repair Surgery, Affiliated Hospital of Youjiang Medical University for Nationalities, Baise, China

<sup>a</sup> Xianfeng Wang, Genchang Chen and Gongle Shen contributed equally to this work.

\* Corresponding authors

E-mail addresses:

[suzhou8182@163.com](mailto:suzhou8182@163.com) (Jianhua Su)

[zhdp1994@163.com](mailto:zhdp1994@163.com) (Dapeng Zhou)

[ysylq2020@126.com](mailto:ysylq2020@126.com) (Sen Yang)

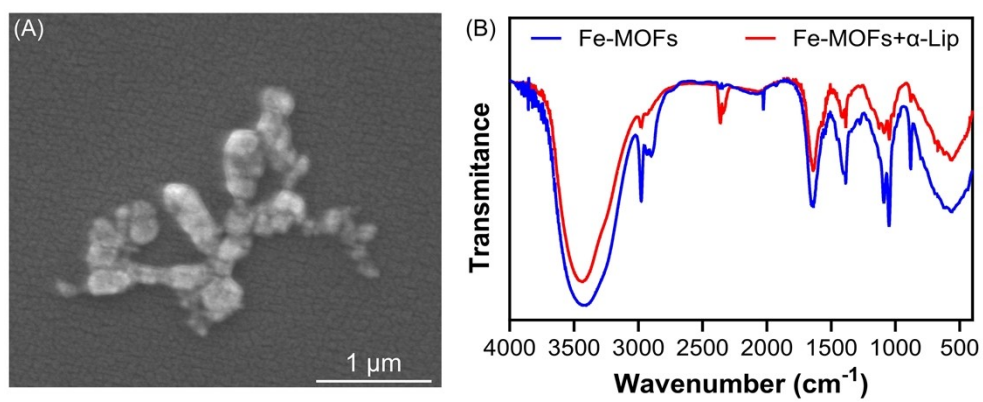

Figure S1 The SEM image (A) and FT-IR (B) of Fe-MOFs after reaction with  $\alpha$ -lipomycin.

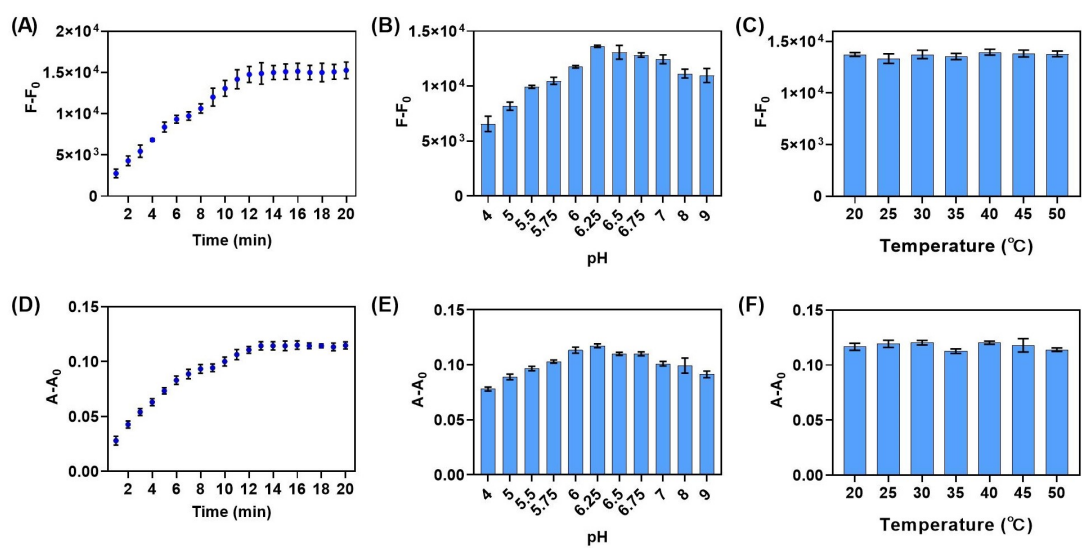

Figure S2 Effects of response time (A, D) pH (B, E) and temperature (C, F) on the reaction between  $\alpha$ -lipomycin and Fe-MOFs nanoprobe in both fluorescent and colorimetric signal.
